# Supplementary material for: An ultrasensitive electrochemical immunosensor for CEA using MWCNT-NH2 supported PdPt nanocages as labels for signal amplification
Source: Royal Society of Chemistry journal article supplement (doi:10.1039/c4tb01695e), 2015-01-01
Supplement: c4tb01695e1.pdf [file c4tb01695e1.pdf]

**An ultrasensitive electrochemical immunosensor for CEA using MWCNTs-NH<sub>2</sub>  
supported PdPt nanocages as labels for signal amplification**

Na Li, Yaoguang Wang, Wei Cao, Yunhui Zhang, Tao Yan, Bin Du, Qin Wei\*

Key Laboratory of Chemical Sensing & Analysis in Universities of Shandong, School  
of Chemistry and Chemical Engineering, University of Jinan, Jinan 250022, China

\*Corresponding authors. Tel.: +86 0531 82765730.

Fax: +86 0531 82765969.

E-mail addresses: sdjndxwq@163.com (Q. Wei).

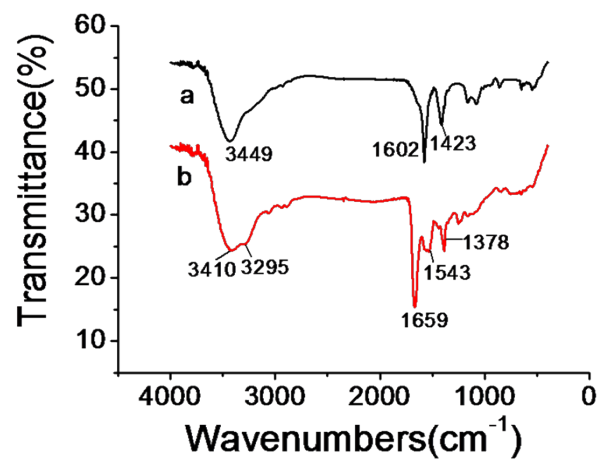

**Fig. S1** The FTIR spectrum of MWCNTs-COOH (a) and MWCNTs-NH<sub>2</sub> (b).

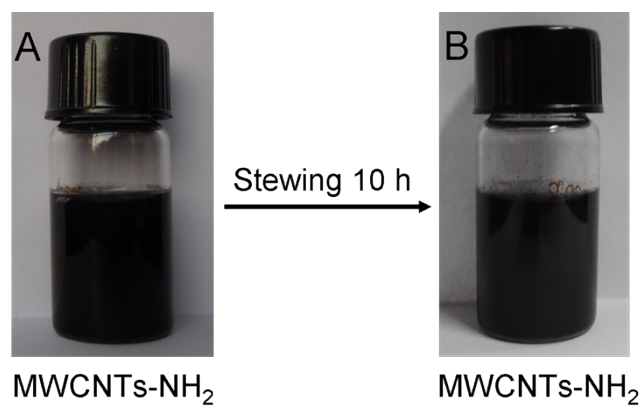

**Fig. S2** The dispersibility of the MWCNTs-NH<sub>2</sub> in water for 0 h (A) and 10 h (B).

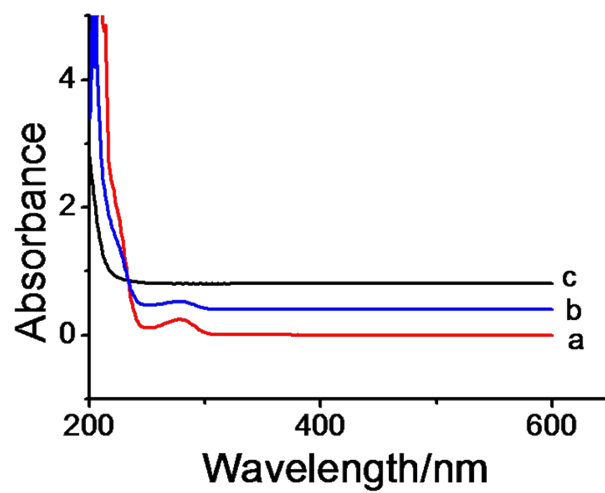

**Fig. S3.** UV-vis spectra of Ab<sub>2</sub> (a); PdPt nanocages/MWCNTs-NH<sub>2</sub>-Ab<sub>2</sub> (b) and PdPt nanocages/MWCNTs-NH<sub>2</sub> (c)

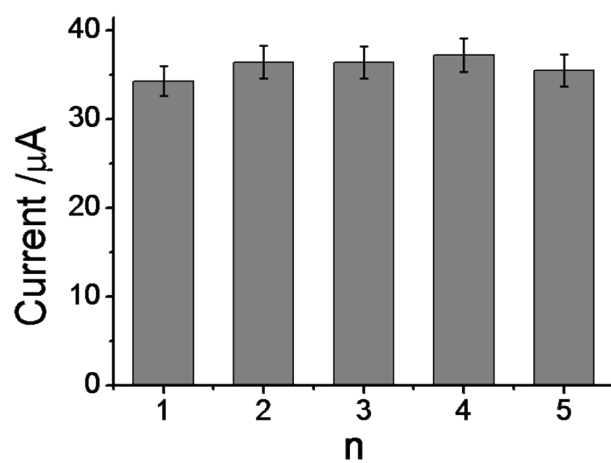

**Fig. S4** Current responses of the immunosensor to 2 ng/mL CEA (1), 2 ng/mL CEA + 200 ng/mL SCC-Ag (2), 2 ng/mL CEA + 200 ng/mL AFP (3), 2 ng/mL CEA + 200 ng/mL glucose (4), 2 ng/mL CEA + 200 ng/mL BSA (5). Error bar=RSD ( $n=5$ ).

**Table S1** Comparison of different methods for the detection of CEA.

| Method                                 | Linear range    | Detection limit | Reference |
|----------------------------------------|-----------------|-----------------|-----------|
| Electrochemiluminescence               | -               | 1.67 pg/mL□     | 1         |
| Fluorescence strategy                  | 0.01-1 ng/mL    | 3 pg/mL         | 2         |
| Chemiluminescence immunosensor         | 0.1-40 ng/mL    | 0.04 ng/mL      | 3         |
| Voltammetric enzyme-linked immunoassay | 0.50-80 ng/ml   | 0.5 ng/mL       | 4         |
| Electrochemiluminescence               | 0.01-10.0 ng/mL | 3.8 pg/mL       | 5         |
| Fluoroimmunoassay                      | -               | 0.85 ng/mL      | 6         |
| Electrochemical immunosensor           | 0.001-20 ng/mL  | 0.2 pg/mL       | This work |

**Table S2:** Here, 2.00 and 5.00 ng/mL CEA were added into the serum sample with the detection of standard addition method.

| Human serum sample (ng/mL) | The addition content (ng/mL) | The detection content (ng/mL) | Average value (ng/mL) | RSD (%) | Recovery (%) |
|----------------------------|------------------------------|-------------------------------|-----------------------|---------|--------------|
| 0.96                       | 2.00                         | 2.71, 3.08, 3.15, 2.79, 2.86  | 2.92                  | 6.48    | 98.0         |
|                            | 5.00                         | 5.85, 5.79, 6.11, 6.07, 6.16  | 6.00                  | 2.75    | 100.8        |

## References

- 1 M. Yang, Y. Chen, Y. Xiang, R. Yuan and Y. Chai, *Biosens. Bioelectron.*, 2013, **50**, 393-398.
- 2 X. Yang, Y. Zhuo, S. Zhu, Y. Luo, Y. Feng and Y. Xu, *Biosens. Bioelectron.*, 2014, **64C**, 345-351.
- 3 L. Chen, Z. Zhang, P. Zhang, X. Zhang and A. Fu, *Sensor. Actuat. B: Chem.*, 2011, **155**, 557-561.
- 4 S. Zhang, J. Yang and J. Lin, *Bioelectrochemistry*, 2008, **72**, 47-52.
- 5 G.-F. Shi, J.-T. Cao, J.-J. Zhang, K.-J. Huang, Y.-M. Liu, Y.-H. Chen and S.-W. Ren, *Analyst*, 2014, **139**, 5827-5834.
- 6 G. Lin, H. Zhao, T. Liu, J. Hou, Z. Ren, W. Huang, W. Dong and Y. Wu, *RSC Advances*, 2014, **4**, 55229-55236.
